# Supplementary material for: No experimental evidence of stress-induced hyperthermia in zebrafish (Danio rerio)
Source: Oxford University Press journal article supplement (doi:10.1242/jeb.192971), 2018-01-01
Supplement: jeb192971supp.pdf [file jeb192971supp.pdf]

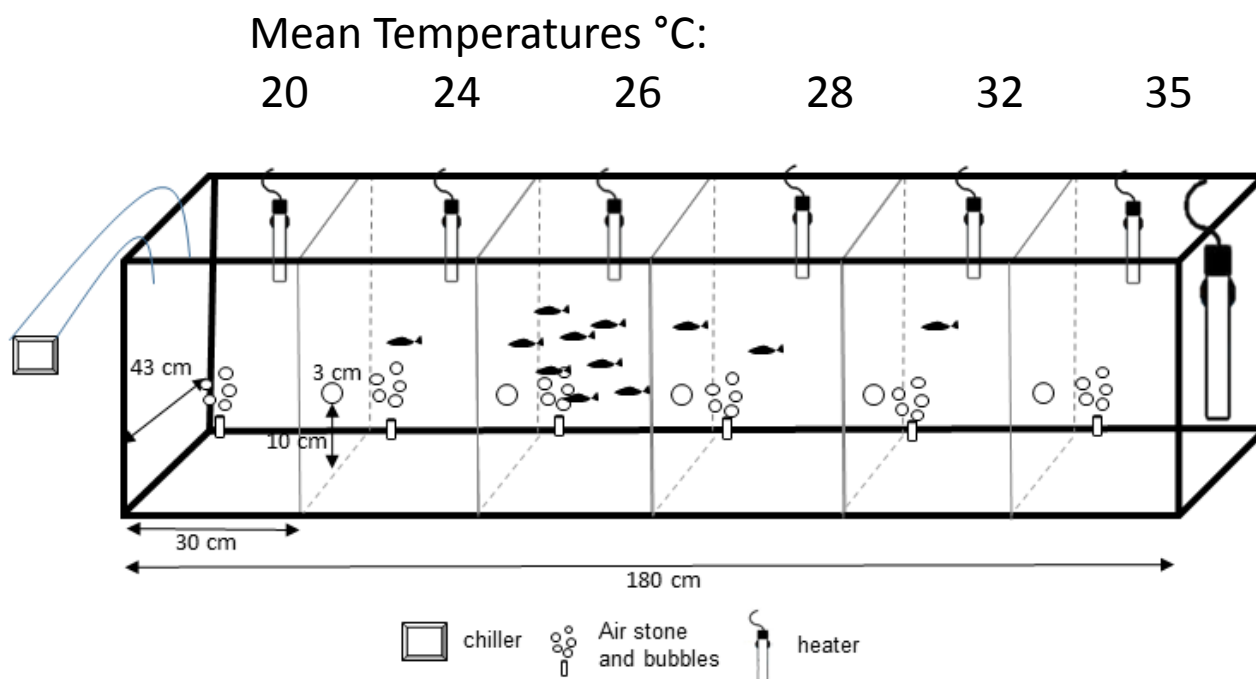

**Figure S1.** Schematic drawing of the experimental setup used in experiment 1, based off the methods detailed in Rey et al (2015). We included a 1cm deep layer of gravel in all chambers but this was not included in the figures for clarity.

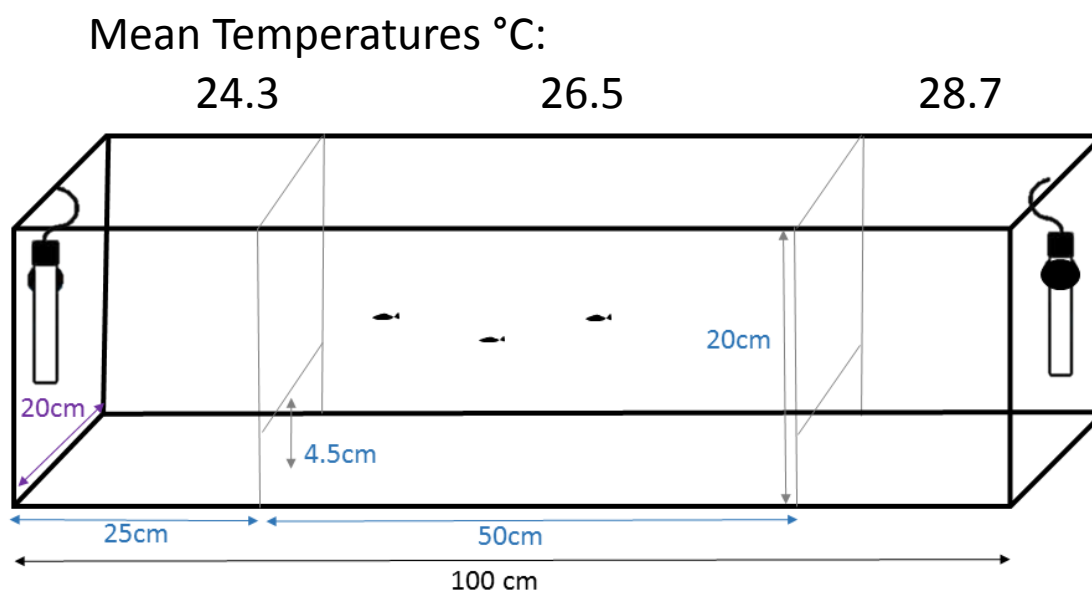

**Figure S2.** Experimental setup used in experiment 2. Mean temperatures were consistent for the top 15 cm of the warm chamber, but dropped to just over 26.6 in the last 5 cm. Here 0.5 cm deep layer of gravel covered the entire bottom of the tank.

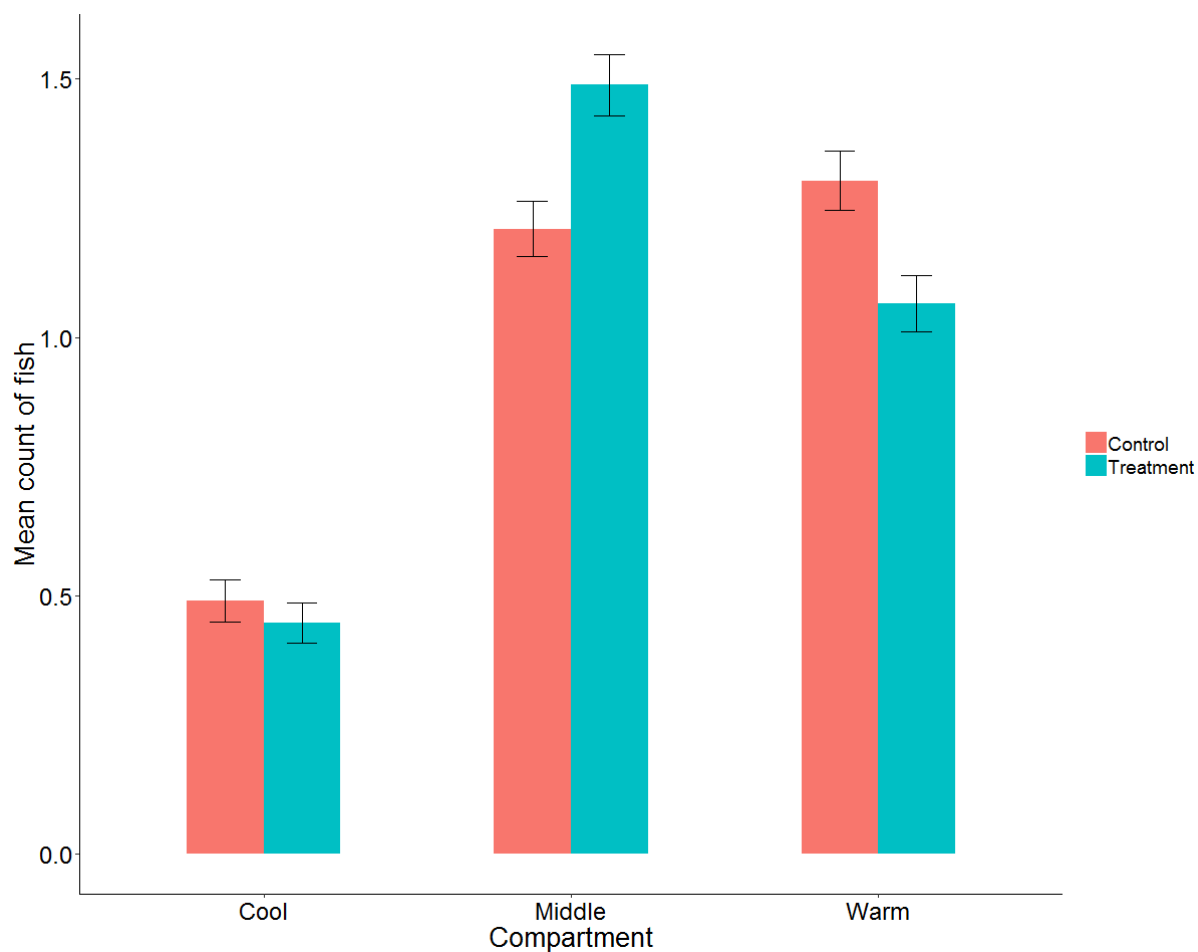

**Figure S3. Mean ( $\pm$  s.e.) numbers of fish in each chamber across the two treatments, stressed (Treatment) and unstressed (Control), taken from all count intervals, every five minutes for 2.5 hours. This gives proxy data for compartment utilisation by the fish to supplement Fig 2.**

## Script: R code used

### Experiment 1

Below is the full R code we used to analyse the data collected for experiment 1.

```
library(ggplot2)
library(plyr)
library(nlme)
library(lme4)
library(mgcv)
library(lattice)
library(lmerTest)
library(MASS)
library(gamm4)
library(lattice)
library(lme4)
library(ggplot2)
library(sp)
library(gstat)
#import data
zebrafish2<- read.table("zebrafish_JEB.txt",header=TRUE)
#Define factors as factors
zebrafish2$Group <- factor(zebrafish2$Group)
zebrafish2$Treatment <- factor(zebrafish2$Treatment)
zebrafish2$total<-12
# Defined correctly?
table(zebrafish2$Group)
table(zebrafish2$Treatment)

#####
# Data visualization

p <- ggplot()
```

```
p <- p + geom_point(data = zebrafish2,
  aes(y = Count, x = Chamber),
  shape = 1,
  size = 1)
p <- p + xlab("chamber number") +
  ylab("Number of fish")
p <- p + theme(text = element_text(size = 15))
p
# Is this a linear or non-linear pattern? - looks non-linear!

p <- p + facet_grid(~ Treatment)
p

#Plot count vs time
p <- ggplot()
p <- p + geom_point(data = zebrafish2,
  aes(y = Count, x = Chamber),
  shape = 16,
  size = 2)
p <- p + facet_wrap( ~ Time)
p

#standardise continuous variables
zebrafish2$Time2<-(zebrafish2$Time-mean(zebrafish2$Time))/(sd(zebrafish2$Time))#scaling time
zebrafish2$chamber2<-(zebrafish2$Chamber-
mean(zebrafish2$Chamber))/(sd(zebrafish2$Chamber))#scaling chamber
#####

# E. Interactions
# Is the quality of the data good enough for an interaction term?

p <- ggplot()
```

```
p <- p + geom_point(data = zebrafish2,
  aes(y = Count, x = chamber2),
  shape = 1,
  size = 1)
p <- p + xlab("Chamber") + ylab("count")
p <- p + theme(text = element_text(size = 15))
p <- p + geom_smooth(data = zebrafish2,
  aes(x = chamber2,
  y = Count))

p <- p + facet_grid(. ~ Time2, scales = "fixed")

p
#yes, could potentially use interaction term

#Models:

gam6 =
gamm(cbind(Count,total)~s(chamber2,Time2)+Treatment,random=list(Group=~1),family=binomial,
method="REML",data=zebrafish2,correlation=corSpher(form =~ 1|chamber2,nugget = TRUE, fixed =
FALSE), niterPQL=50)

gam.check(gam6$gam)#ok
plot(gam6$gam)
E6 <- resid(gam6$lme, type = "normalized")
acf(E6)# looks better!
plot(gam6$lme)##looks better
dev.off()
vis.gam(gam6$gam,view=c("chamber2","Time2"),theta=30,phi=30,type="response",color="gray")

#model without the fixed effect treatment:
```

```
gam6b =  
gamm(cbind(Count,total)~s(chamber2,Time2),random=list(Group=~1),family=binomial,method="RE  
ML",data=zebrafish2,correlation=corSpher(form =~ 1 | chamber2,nugget = TRUE, fixed = FALSE),  
niterPQL=50)  
  
#compare both models  
  
#library(itsadug)  
  
AIC(gam6$lme,gam6b$lme)  
  
#    df    AIC  
# gam6$lme 8 825.6905  
# gam6b$lme 7 819.8443  
  
  
#model with no treatment effect is better!  
  
#model without the interaction  
  
gam6c =  
gamm(cbind(Count,total)~s(chamber2,k=3)+Time2+Treatment,random=list(Group=~1),family=binomial,method="REML",data=zebrafish2,correlation=corSpher(form =~ 1 | Time2,nugget = TRUE, fixed = FALSE), niterPQL=50)  
  
#how to compare?  
  
AIC(gam6b$lme,gam6c$lme)  
  
#    df    AIC  
# gam6b$lme 7 8.198443e+02  
# gam6c$lme 8 4.328029e+07  
#model with interaction is better!  
  
#CHOOSE MODEL GAM6B  
  
  
gam6b =  
gamm(cbind(Count,total)~s(chamber2,Time2),random=list(Group=~1),family=binomial,method="REML",data=zebrafish2,correlation=corSpher(form =~ 1 | chamber2,nugget = TRUE, fixed = FALSE),  
niterPQL=50)  
  
  
#other approach not taken into account possible autocorrelation  
  
zebrafish2_15<-zebrafish2[zebrafish2$Time==15,]
```

```
zebrafish2_15<-zebrafish2_15[!zebrafish2_15$Chamber %in% c('1', '5','6'),]  
zebrafish2_15.t = xtabs(Count ~ Treatment +Chamber, data = zebrafish2_15)  
chisq.test(zebrafish2_15.t)
```

```
zebrafish2_30<-zebrafish2[zebrafish2$Time==30,]  
zebrafish2_30<-zebrafish2_30[!zebrafish2_30$Chamber %in% c('1', '5','6'),]  
zebrafish2_30.t = xtabs(Count ~ Treatment +Chamber, data = zebrafish2_30)  
chisq.test(zebrafish2_30.t)
```

```
zebrafish2_60<-zebrafish2[zebrafish2$Time==60,]  
zebrafish2_60<-zebrafish2_60[!zebrafish2_60$Chamber %in% c('1', '5','6'),]  
zebrafish2_60.t = xtabs(Count ~ Treatment +Chamber, data = zebrafish2_60)  
chisq.test(zebrafish2_60.t)
```

```
zebrafish2_120<-zebrafish2[zebrafish2$Time==120,]  
zebrafish2_120<-zebrafish2_120[!zebrafish2_120$Chamber %in% c('1', '5','6'),]  
zebrafish2_120.t = xtabs(Count ~ Treatment +Chamber, data = zebrafish2_120)  
chisq.test(zebrafish2_120.t)
```

## **Experiment 2 Preference index**

```
library(lattice)  
library(readxl)  
library(data.table)  
library(sjPlot)  
library(ggplot2)  
library(ggsignif)  
library(coefplot2)  
library(lme4)  
library(car)  
library(effects)  
library(lsmmeans)  
library(lmerTest)
```

```
library(rptR)
library(broom)
detach("package:lmerTest", unload=TRUE)
library(plyr)
library(dplyr)
library(pBrackets)

##import data
Zeb5MinOnly=read_excel("../ESM1_Data.xlsx", sheet = "Expt2_5Min")
head(ZebData)
head(Zeb5MinOnly)
str(ZebData)

Zeb5MinOnly$Condition = as.factor(Zeb5MinOnly$Condition)
Zeb5MinOnly$Group = as.factor(Zeb5MinOnly$Group)
Zeb5MinOnly$Treatment = as.factor(Zeb5MinOnly$Treatment)

zebbby5Min <-
ddply(Zeb5MinOnly,c("CountTime","Condition"),summarise,nCounts=length(CountTime), Median =
mean(J_Hot,na.rm=TRUE), JacobsIndex = mean(J_Hot,na.rm=TRUE), Tse=
sd(J_Hot,na.rm=TRUE)/(nCounts)^0.5)

zebbby5Min

ggplot(zebbby5Min,aes(x=CountTime,y=JacobsIndex))+ theme_classic()+
  geom_point(size=6,aes(shape=Condition))+ geom_errorbar(aes(ymin=JacobsIndex-Tse,
ymax=JacobsIndex+Tse,width=.1)) +ylim(-1.2,1.2) + labs(y = "Jacob's Index", x = "Time (min)")+
  theme(axis.text=element_text(size=18,color = "black"), axis.title=element_text(size=20,color =
"black")) + theme(legend.text=element_text(size=18)) +theme(legend.position = "top") +
  theme(legend.title = element_blank()) + scale_shape_manual(values=c(19, 2)) +
  theme(axis.title.y = element_text(margin = margin(r=3)), axis.title.x = element_text(margin =
margin(b=3)))
```



```
grid.brackets(300, 445, 95, 445, lwd=2, col="grey")
grid.brackets(825, 445, 302, 445, lwd=2, col="black")

##Plot for Fig S.3: Time spent in warmer compartment according to groups overall
#1#Caluclate Mean count  of fish in each chamber

#For Warm chamber

CumCountWarm <- ddpoly(Zeb5MinOnly,c("Condition"),summarise,nCounts=length(Group), Mean =
mean(Warm,na.rm=TRUE), Tse= sd(Warm,na.rm=TRUE)/(nCounts)^0.5, Sd = sd(Warm))

#Rename chamber

CumCountWarm$Chamber <- "Warm"

#Quick plots

ggplot(CumCountWarm,aes(x=Condition,y=Mean ))+ theme_classic()+
  geom_point(size=6, shape=18) + geom_errorbar(aes(ymin=Mean-Tse, ymax=Mean+Tse,width=.1))

ggplot(CumCountWarm,aes(x=Condition,y=Mean, fill = Condition ))+ theme_classic()+
  geom_bar(size=6, shape=18, stat = "identity") + geom_errorbar(aes(ymin=Mean-Tse,
ymax=Mean+Tse,width=.1))

#for CoolChamber

CumCountCool <- ddpoly(Zeb5MinOnly,c("Condition"),summarise,nCounts=length(Group), Mean =
mean(norm,na.rm=TRUE), Tse= sd(norm,na.rm=TRUE)/(nCounts)^0.5, Sd = sd(norm))

#Plots

ggplot(CumCountCool,aes(x=Condition,y=Mean, fill = Condition ))+ theme_classic()+
  geom_bar(size=6, shape=18, stat = "identity") + geom_errorbar(aes(ymin=Mean-Tse,
ymax=Mean+Tse,width=.1))

#Rename chamber

CumCountCool$Chamber <- "Cool"

#for Mid

CumCountMid <- ddpoly(Zeb5MinOnly,c("Condition"),summarise,nCounts=length(Group), Mean =
mean(Mid,na.rm=TRUE), Tse= sd(Mid,na.rm=TRUE)/(nCounts)^0.5, Sd = sd(Mid))
```

```
#Plots

ggplot(CumCountMid,aes(x=Condition,y=Mean ))+ theme_classic()+
  geom_point(size=6, shape=18) + geom_errorbar(aes(ymin=Mean-Tse, ymax=Mean+Tse,width=.1))

ggplot(CumCountMid,aes(x=Condition,y=Mean, fill = Condition ))+ theme_classic()+
  geom_bar(width=0.5, stat = "identity") + geom_errorbar(aes(ymin=Mean-Tse,
ymax=Mean+Tse,width=.1))

#Rename chamber

CumCountMid$Chamber <- "Middle"

##For all chambers at same time merge:

ForSupp <- rbind(CumCountCool,CumCountMid)

ForSuppAll <- rbind(ForSupp,CumCountWarm)

##Plot for figure S.3

ggplot(ForSuppAll,aes(x=Chamber,y=Mean, fill =Condition ))+ theme_classic()+
  geom_bar(width=0.5, stat = "identity", position = "dodge") + geom_errorbar(aes(ymin=Mean-Tse,
ymax=Mean+Tse),width=.2, position=position_dodge(.5)) +
  labs(y = "Mean count of fish", x = "Compartment")+
  theme(axis.text=element_text(size=18,color = "black"), axis.title=element_text(size=20,color =
"black")) +
  theme(legend.text=element_text(size=14)) + theme(legend.title = element_blank())

#staistical analysis

###Do fish in initial xx minutes post confinement have significantly different Jacob's index of
preference for warm area to those fish that were not confined?

ZebFirst15<- subset(Zeb5MinOnly, subset = CountTime <= 20)

ZebFirst15

ZebFirst40<- subset(Zeb5MinOnly, subset = CountTime <= 46)

ZebFirst40

ZebNotFirst15<- subset(Zeb5MinOnly, subset = CountTime > 46)

ZebNotFirst15
```

```
ZebLast15<- subset(Zeb5MinOnly, subset = CountTime >= 130)
```

```
ZebLast15
```

```
plotme = ddply(ZebFirst15,c("Condition"),summarise,MedianJacobsIndex =  
median(J_Hot,na.rm=TRUE), MeanJacobsIndex = mean(J_Hot,na.rm=TRUE), Tse=  
sd(J_Hot,na.rm=TRUE)) #/(nCounts)^0.5
```

```
plotme
```

```
ggplot(plotme,aes(x=Condition,y=MeanJacobsIndex, color=Condition))+ theme_classic()+  
  geom_point(size=6, shape=18)+ geom_errorbar(aes(ymin=MeanJacobsIndex-Tse,  
ymax=MeanJacobsIndex+Tse,width=.1)) +ylim(-1.5,1.5) + labs(y = "JacobsIndex", x = "Time")+  
  theme(axis.text=element_text(size=18,color = "black"), axis.title=element_text(size=20,color =  
"black")) + theme(legend.text=element_text(size=10)) +theme(legend.position = "top") +  
  theme(legend.title=element_blank() +  
  
  theme(axis.title.y = element_text(margin = margin(r=3)), axis.title.x = element_text(margin =  
margin(b=3))))
```

```
ggplot(data = ZebFirst15, aes(y = J_Hot, x = factor(CountTime))) +ylim(-1.1,1.1) + labs(y = "Preference  
score (Jacon's Index 'R')", x = "Time (minutes)")+
```

```
  geom_boxplot(aes(fill = Condition))
```

```
ggplot(data = Zeb5MinOnly, aes(y = J_Hot, x = factor(CountTime))) +ylim(-1.1,1.1)+ labs(y =  
"Preference score", x = "Time (minutes)")+
```

```
  geom_boxplot(aes(fill = Condition))
```

```
plot(J_Hot ~ Condition, data = ZebFirst15, ylim=c(-1.5,1.5), main ="Initial 15 min")
```

```
boxplot(J_Hot ~ Condition + CountTime, data =Zeb5MinOnly , ylim=c(-1,1), main ="After initial min")
```

```
plot(J_Hot ~ Condition, data = ZebData, ylim=c(-1,1), main ="All time min")
```

##t test for quick comparison - In first 15 minutes do fish in different treatments have different preferences for the hot chamber?

```
t.test(ZebFirst15$J_Hot~ZebFirst15$Condition) ## sig
```

```
t.test(ZebFirst15$J_Hot~ZebFirst15$Condition, var.equal = TRUE) ## sig
```

```
t.test(ZebNotFirst15$J_Hot~ZebNotFirst15$Condition) ## sig
```

```
t.test(ZebNotFirst15$J_Hot~ZebNotFirst15$Condition, var.equal = TRUE) ## sig
```

```
##check for normality
```

```
qqPlot(ZebFirst15$J_Hot) ## decent...
```

```
##F test for equal variance
```

```
res.ftest <- var.test(J_Hot ~ Condition, data = ZebFirst15)
```

```
res.ftest ## equal variance
```

```
##t test for comparison of 'Post' period
```

```
t.test(DPost15min$J_Hot~DPost15min$Treatment) ## Not sig - So No!
```

```
t.test(DPost15min$J_Hot~DPost15min$Treatment, var.equal = TRUE) ## No
```

```
##check for normality
```

```
qqPlot(ZebNotFirst15$J_Hot) ## no
```

```
##F test for equal variance
```

```
res.ftest <- var.test(J_Hot ~ Treatment, data = ZebNotFirst15)
res.ftest ## very equal variance

##t test for comaprison of 'End' period
t.test(ZebLast15$J_Hot~ZebLast15$Condition) ## Not sig -

t.test(ZebLast15$J_Hot~ZebLast15$Condition, var.equal = TRUE) ## No

##check for normality
qqPlot(ZebNotFirst15$J_Hot) ## no
##F test for equal variance
res.ftest <- var.test(J_Hot ~ Condition, data = ZebNotFirst15)
res.ftest ## very equal variance

##t test for comaprison of 'Total' period

t.test(Zeb5MinOnly$J_Hot~Zeb5MinOnly$Condition) ## Yes, sig

t.test(Zeb5MinOnly$J_Hot~Zeb5MinOnly$Condition, var.equal = TRUE) ## Yes

##check for normality

qqPlot(ZebLast15$J_Hot) ## no
##F test for equal variance
res.ftest <- var.test(J_Hot ~ Condition, data = ZebLast15)
res.ftest ## very equal variance

## t-test for each CountInterval
```

## ##Assumptions

### ##Check for Normality with S-Wilkes test

```
with(Zeb5MinOnly, shapiro.test(J_Hot[Condition == "Treatment"]))# p = 0.0001 - Failed, use Wilcoxon
```

### # Shapiro-Wilk normality test

```
with(Zeb5MinOnly, shapiro.test(J_Hot[Condition == "Control"])) # p = 0.0006
```

### #Wilcoxon test - reported in results

```
resAll <- wilcox.test(J_Hot ~ Condition, data = Zeb5MinOnly,  
  exact = FALSE)
```

resAll

### #First 20 minutes

```
resFirst <- wilcox.test(J_Hot ~ Condition, data = ZebFirst15,  
  exact = FALSE)
```

resFirst

### #First 46 minutes

```
resFirst40 <- wilcox.test(J_Hot ~ Condition, data = ZebFirst40,  
  exact = FALSE)
```

resFirst40

### #last 15 minutes

```
resEnd <- wilcox.test(J_Hot ~ Condition, data = ZebNotFirst15,  
  exact = FALSE)
```

resEnd

## Experiment 2 R code – Breakpoint analysis

Below is the full R code we used to extract the inflection point of change in the time series of the Jacobs preference index for the net and control treatment time series.

```
library(caTools)

data_exp3 = data.frame(read.csv('Exp3_forR.csv', header = TRUE))

#---separate in control and treatment---#
control = data_exp3[data_exp3$Condition == 'Control',]
net = data_exp3[data_exp3$Condition == 'Net',]

#-----NET TREATMENT-----#

data_in = net
ucount = unique(data_in$CountTime)
mean_control = rep(NA, length(ucount))

for (i in 1:length(ucount)){
  dat = data_in[data_in$CountTime == ucount[i],]
  mean_control[i] = mean(dat$J_Hot)
}

net_series = mean_control

#---plot chamber preferences vs. counts for net treatment---#
frame()
par(mfrow = c(1,1))
plot(ucount, mean_control, type = 'l', ylim = c(-2,2), col = 'red', xlab = 'count', ylab = 'preference
index', main = 'Net Treatment Response')

#====--Calculate inflection points using a loess smoothing function-----==#

#---step 1: Smooth data---#
frame()
```

```
par(mfrow = c(3,1))
par(mar = c(3,5,2,3))
y = net_series
x = ucount
plot(x,y, type = 'l', ylim = c(-2,2), ylab = 'Jacobs index', lwd = 2, cex.lab = 1.8, cex.axis = 1.5, xlab = '')
lo <- loess(y~x) #use a loess smoothing function to smooth data
xl <- seq(min(x),max(x), (max(x) - min(x))/1000)
out = predict(lo,xl)
#plot smoothed index
plot(xl, out, type = 'l', lwd = 2, cex.lab = 1.8, cex.axis = 1.5, ylab = 'smoothed Jacobs index', xlab = '')

#---step 2: find places in the smoothed y values where the change in y switches sign.
infl <- c(FALSE, diff(diff(out))>0)!=0)

# add points to the graph where these inflections occur.
diff_out = diff(out)
plot(xl[1:length(xl)-1], diff_out,type = 'l', lwd = 2, cex.lab = 1.8, cex.axis = 1.5, xlab = 'time (min)', ylab = 'differenced smoothed Jacobs index')
infl_t = which(infl==TRUE)
points(xl[infl_t[1]], diff_out[infl_t[1]], pch = 21, cex = 2)
legend('topright', 'inflection point', pch = 21, cex = 1.4)

#---extract inflection point---#
inf_net = xl[infl_t[1]] #46.6 min

#-----CONTROL TREATMENT-----#
data_in = control
ucount = unique(data_in$CountTime)
mean_control = rep(NA, length(ucount))
```



```
for (i in 1:length(ucount)){
  dat = data_in[data_in$CountTime == ucount[i],]
  mean_control[i] = mean(dat$J_Hot)
}

control_series = mean_control

#----plot preference index vs. counts for control groups----#
frame()
par(mfrow = c(1,1))
plot(ucount,control_series, type = 'l', ylim = c(-2,2), xlab = 'count', ylab = 'preference index', main =
'Control Treatment Response')

#====----Calculate inflection points using a loess smoothing function-----====#

#---step 1: Smooth data----#
frame()
par(mfrow = c(3,1))
par(mar = c(3,5,2,3))
y = control_series
x = ucount
plot(x,y, type = 'l', ylim = c(-2,2), ylab = 'Jacobs index', lwd = 2, cex.lab = 1.8, cex.axis = 1.5, xlab = "")
lo <- loess(y~x) #uses a loess smoothing function
xl <- seq(min(x),max(x), (max(x) - min(x))/1000)
out = predict(lo,xl)
#---plot smoothed Jacobs Index---#
plot(xl, out, type = 'l', lwd = 2, cex.lab = 1.8, cex.axis = 1.5, ylab = 'smoothed Jacobs index', xlab = "")

#---step 2: find places in the smoothed y values where the change in y switches sign.
infl <- c(FALSE, diff(diff(out)>0)!=0)
```

```
# add points to the graph where these inflections occur.
```

```
diff_out = diff(out)
```

```
plot(xl[1:length(xl)-1], diff_out,type = 'l', lwd = 2, cex.lab = 1.8, cex.axis = 1.5, xlab = 'time (min)', ylab = 'differenced smoothed Jacobs index')
```

```
infl_t = which(infl==TRUE)
```

```
points(xl[infl_t[1]], diff_out[infl_t[1]], pch = 21, cex = 2)
```

```
legend('topright', 'inflection point', pch = 21, cex = 1.4)
```

```
#---extract inflection point---#
```

```
inf_control = xl[infl_t[1]] #31.4 min
```

**Table S1.** Raw data from all zebrafish hyperthermia experiments.

[Click here to Download Table S1](#)
